# Supplementary material for: Synthesis, optical properties and charge transport characteristics of a series of novel thiophene-fused phenazine derivatives
Source: Royal Society of Chemistry journal article supplement (doi:10.1039/c3tc30346b), 2013-01-01
Supplement: c3tc30346b.pdf [file c3tc30346b.pdf]

## Supporting Information

# Synthesis, optical properties and charge transport characteristics of a series of novel thiophene-fused phenazine derivatives

Yongfa Xie,<sup>a</sup> Takuya Fujimoto,<sup>a</sup> Simon Dalglish,<sup>a</sup> Yoshiaki Shuku,<sup>a</sup> Michio M. Matsushita\*<sup>a</sup> and Kunio Awaga\*<sup>a,b</sup>

<sup>a</sup> Department of Chemistry & Research Center for Material Science, Nagoya University, Furo-cho, Chikusa-ku, Nagoya 464-8602, Japan. E-mail: mmmatsushita@nagoya-u.jp, Awaga@mbox.chem.nagoya-u.ac.jp

<sup>b</sup> CREST, JST, Furo-cho, Chikusa-ku, Nagoya 464-8602, Japan.

### Contents

|                                                                                               |         |
|-----------------------------------------------------------------------------------------------|---------|
| 1. Cyclic voltammograms of thin films of <i>l</i> -TTP and <i>m</i> -TTP.                     | 2       |
| 2. Out-of-plane XRD pattern of <i>l</i> -TTP, <i>m</i> -TTP and <i>t</i> -TTP.                | 2       |
| 3. DFT and TD-DFT calculations and Optical spectra.                                           | 3 ~ 16  |
| 4. Intermolecular contacts of <i>l</i> -TTP, <i>m</i> -TTP, <i>t</i> -TTP and <i>l</i> -HTTP. |         |
| .....                                                                                         | 17 ~ 20 |

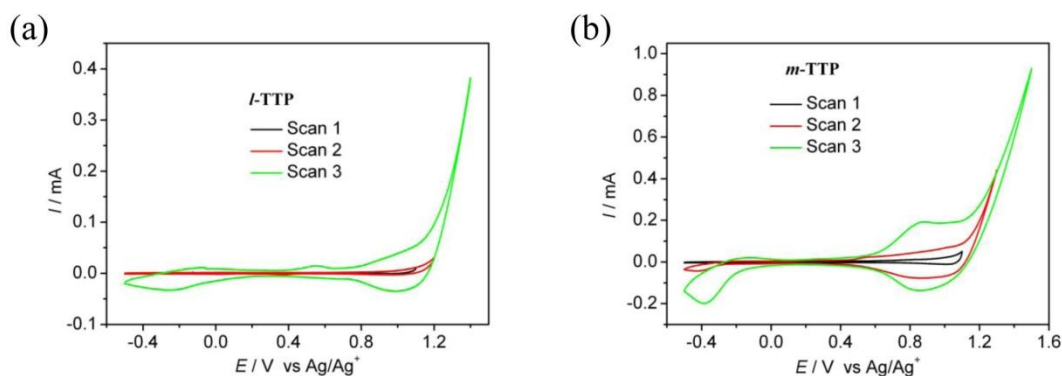

**Figure S1.** Cyclic voltammograms (scan rate  $100 \text{ mV s}^{-1}$ ) of 100nm thin film of *l*-TTP and *m*-TTP on ITO recorded in DCM solution containing  $(n\text{-Bu}_4\text{N})\text{PF}_6$  (0.1M) as electrolyte. ITO and a Pt electrode were used for the working electrode and the counter electrode, respectively. Potentials referenced to  $\text{Ag}/\text{Ag}^+$ .

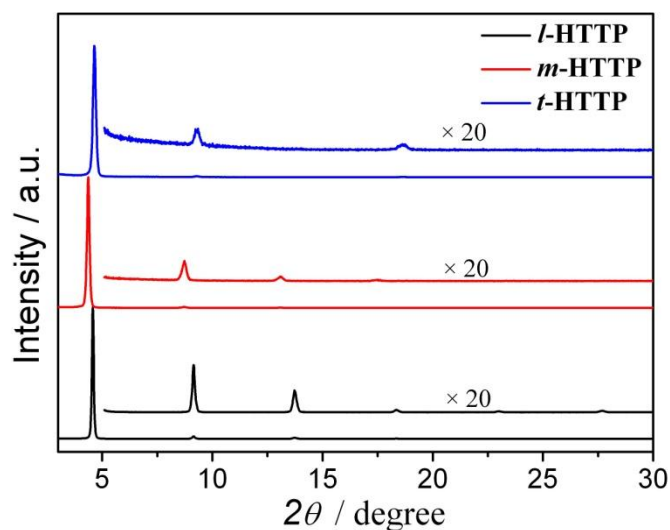

**Figure S2.** Out-of-plane XRD pattern of *l*-HTTP, *t*-HTTP and *m*-HTTP vacuum-sublimed on Si substrates (no peak in in-plane spectrum) with  $T_{\text{sub}} = 75^\circ\text{C}$ .

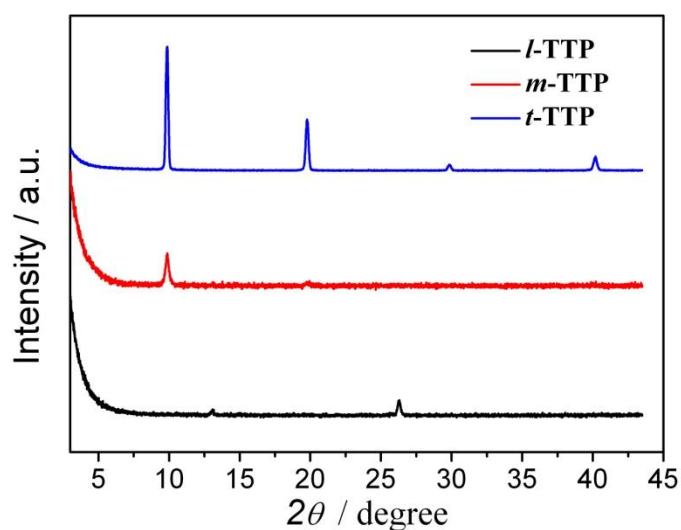

**Figure S3.** Out-of-plane XRD pattern (Cu  $K\alpha$  source:  $\lambda = 1.541 \text{ \AA}$ ) of *l*-TTP, *m*-TTP and *t*-TTP vacuum-sublimed on Si substrates (no peak in in-plane spectrum) at  $T_{\text{sub}} = 25^\circ\text{C}$ .

**Table S1. Absorption wavelengths and their theoretical assignments for *l*-TTP, *m*-TTP, *t*-TTP, *l*-TTA, and *t*-TTA.**

|                     | Observed absorption band ( $\lambda_{\max}$ ) | Calculated by TD-DFT | Assigned transition <sup>a</sup> | Energy difference | Contribution | Oscillator strength ( <i>f</i> ) |
|---------------------|-----------------------------------------------|----------------------|----------------------------------|-------------------|--------------|----------------------------------|
| <b><i>l</i>-TTP</b> | 302 nm                                        | 286 nm               | HOMO→LUMO + 2                    | 4.56 eV           | 0.24         | 0.831                            |
|                     |                                               |                      | HOMO - 2→LUMO                    | 3.74 eV           | 0.64         |                                  |
|                     | 408 nm                                        | 375 nm               | HOMO→LUMO + 2                    | 4.56 eV           | 0.62         | 0.399                            |
|                     |                                               |                      | HOMO - 2→LUMO                    | 3.74 eV           | -0.16        |                                  |
| <b><i>m</i>-TTP</b> | 312 nm                                        | 309 nm               | HOMO→LUMO + 1                    | 4.42 eV           | 0.58         | 0.381                            |
|                     |                                               |                      | HOMO - 1→LUMO                    | 3.50 eV           | -0.12        |                                  |
|                     | 439 nm                                        | 405 nm               | HOMO→LUMO + 1                    | 4.42 eV           | 0.22         | 0.325                            |
|                     |                                               |                      | HOMO - 1→LUMO                    | 3.50 eV           | 0.64         |                                  |
| <b><i>t</i>-TTP</b> | 320 nm                                        | 311 nm               | HOMO - 1→LUMO + 1                | 4.37 eV           | 0.63         | 0.797                            |
|                     |                                               |                      | HOMO→LUMO                        | 3.29 eV           | 0.13         |                                  |
|                     | 467 nm                                        | 432 nm               | HOMO - 1→LUMO + 1                | 4.37 eV           | -0.22        | 0.302                            |
|                     |                                               |                      | HOMO→LUMO                        | 3.29 eV           | 0.64         |                                  |
| <b><i>l</i>-TTA</b> | 300 nm (strong)                               | 286 nm               | HOMO→LUMO + 2                    | 4.63 eV           | 0.59         | 1.446                            |
|                     |                                               |                      | HOMO - 1→LUMO                    | 4.13 eV           | 0.35         |                                  |
|                     | 479 nm (weak)                                 | 350 nm               | HOMO→LUMO + 2                    | 4.63 eV           | -0.35        | 0.127                            |
|                     |                                               |                      | HOMO - 1→LUMO                    | 4.13 eV           | 0.61         |                                  |
| <b><i>t</i>-TTA</b> | 310 nm (strong)                               | 320 nm               | HOMO→LUMO + 1                    | 4.09 eV           | 0.60         | 1.262                            |
|                     |                                               |                      | HOMO - 1→LUMO                    | 3.77 eV           | -0.37        |                                  |
|                     | 418 nm (weak)                                 | 393 nm               | HOMO→LUMO + 1                    | 4.09 eV           | 0.37         | 0.058                            |
|                     |                                               |                      | HOMO - 1→LUMO                    | 3.77 eV           | 0.60         |                                  |

<sup>a</sup> Assigned transitions and their corresponding energy difference were showed in Figure 4.

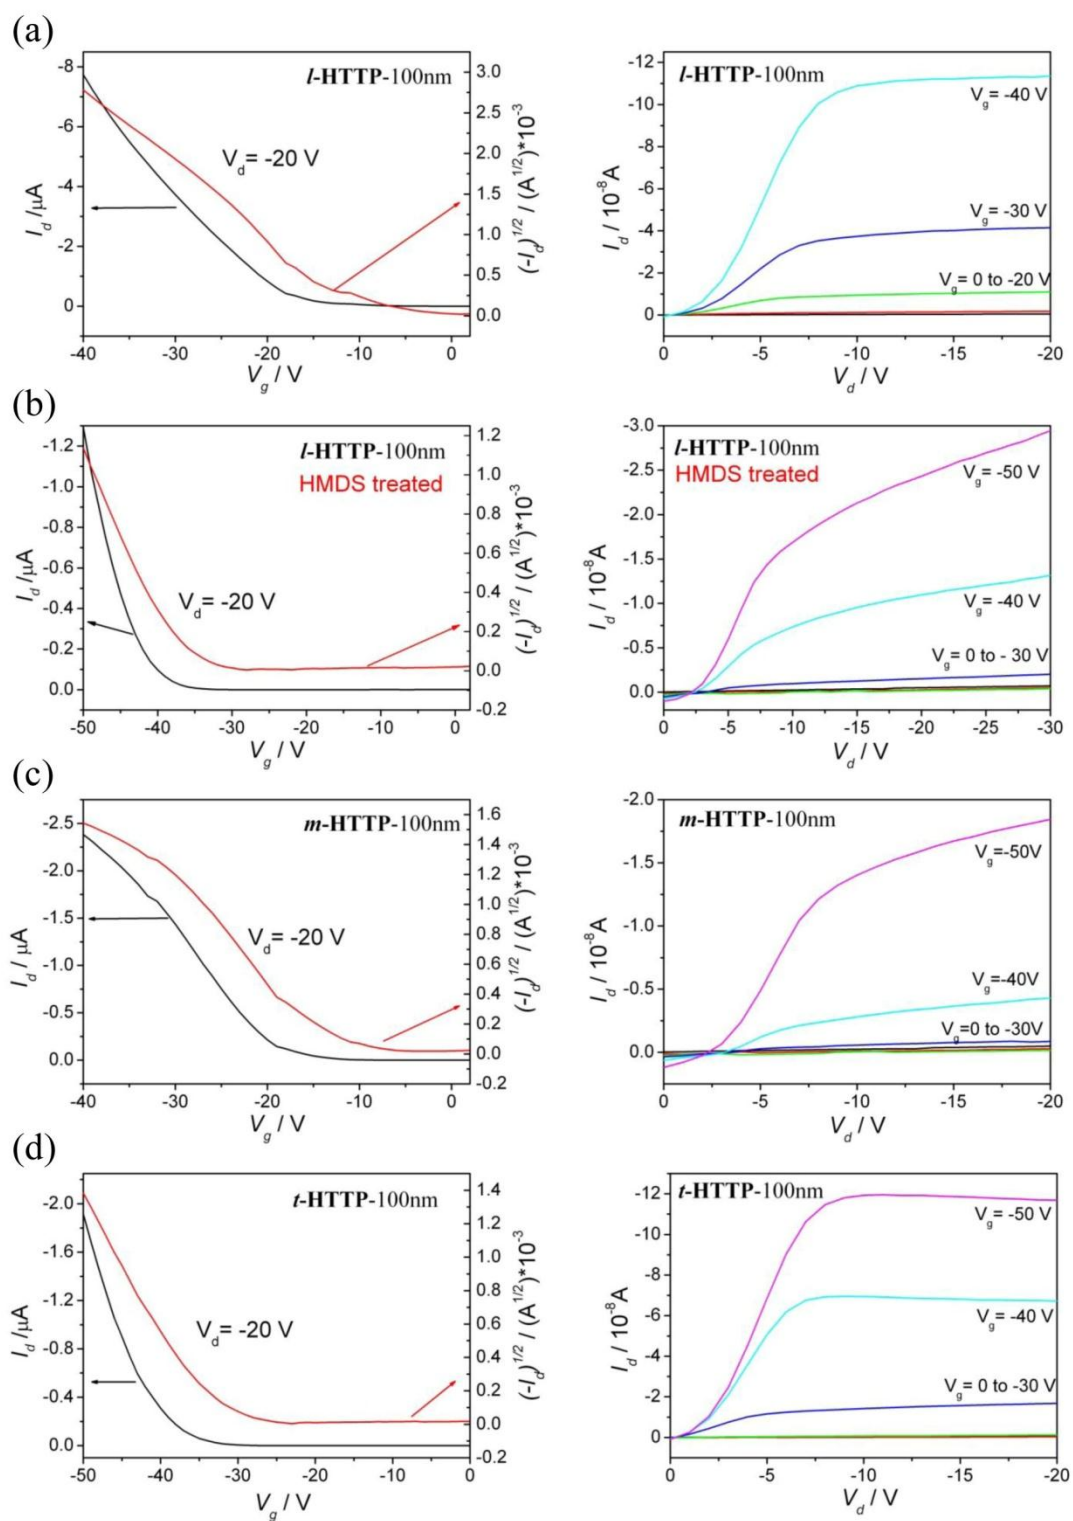

**Figure S4.** Transfer (left) and output (right) characteristics of thin films of *l*-HTTP (a), *m*-HTTP (c) and *t*-HTTP (d) vacuum-sublimed on SiO<sub>2</sub>/Si. Thin film of *l*-HTTP on HMDS treated SiO<sub>2</sub>/Si (b).

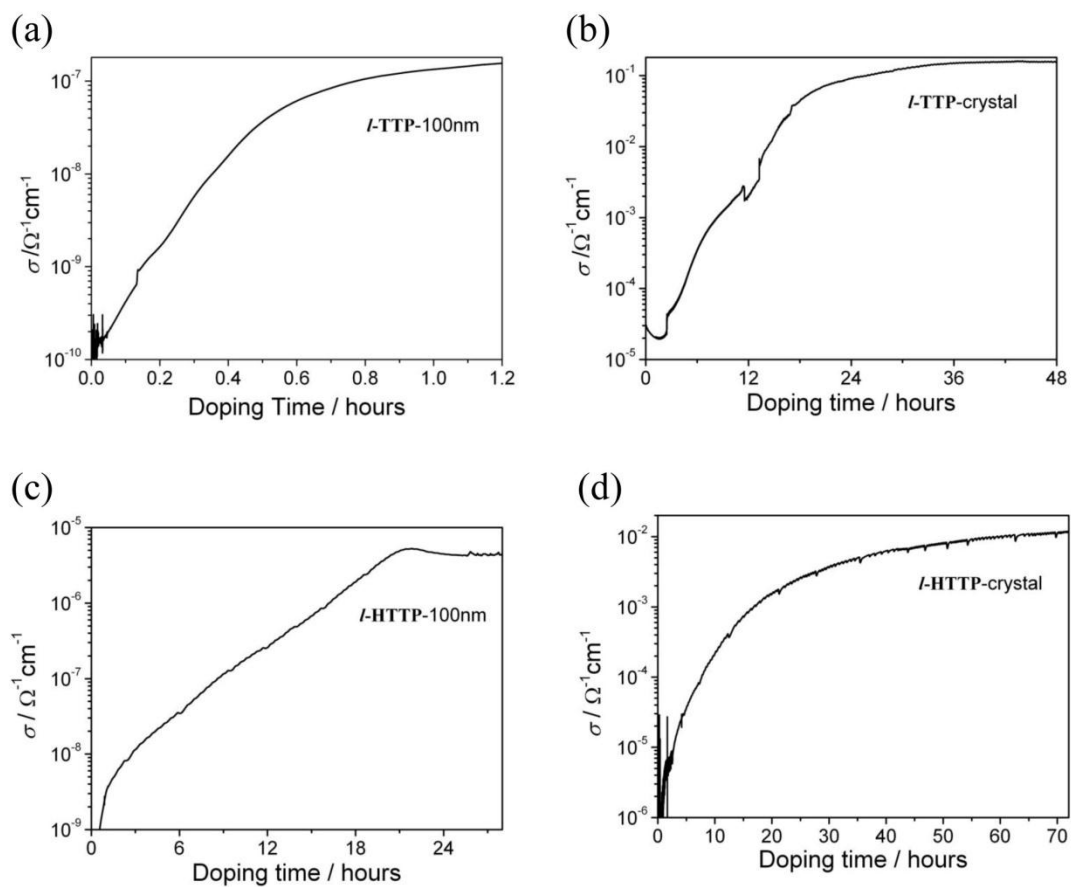

**Figure S5.** Conductivity change during  $\text{I}_2$  vapor doping in thin film (a) and crystal (b) of *l*-TTP; and thin film (c) and crystal (d) of *l*-HTTP (conductivity data of the other derivatives are listed in Table 4).

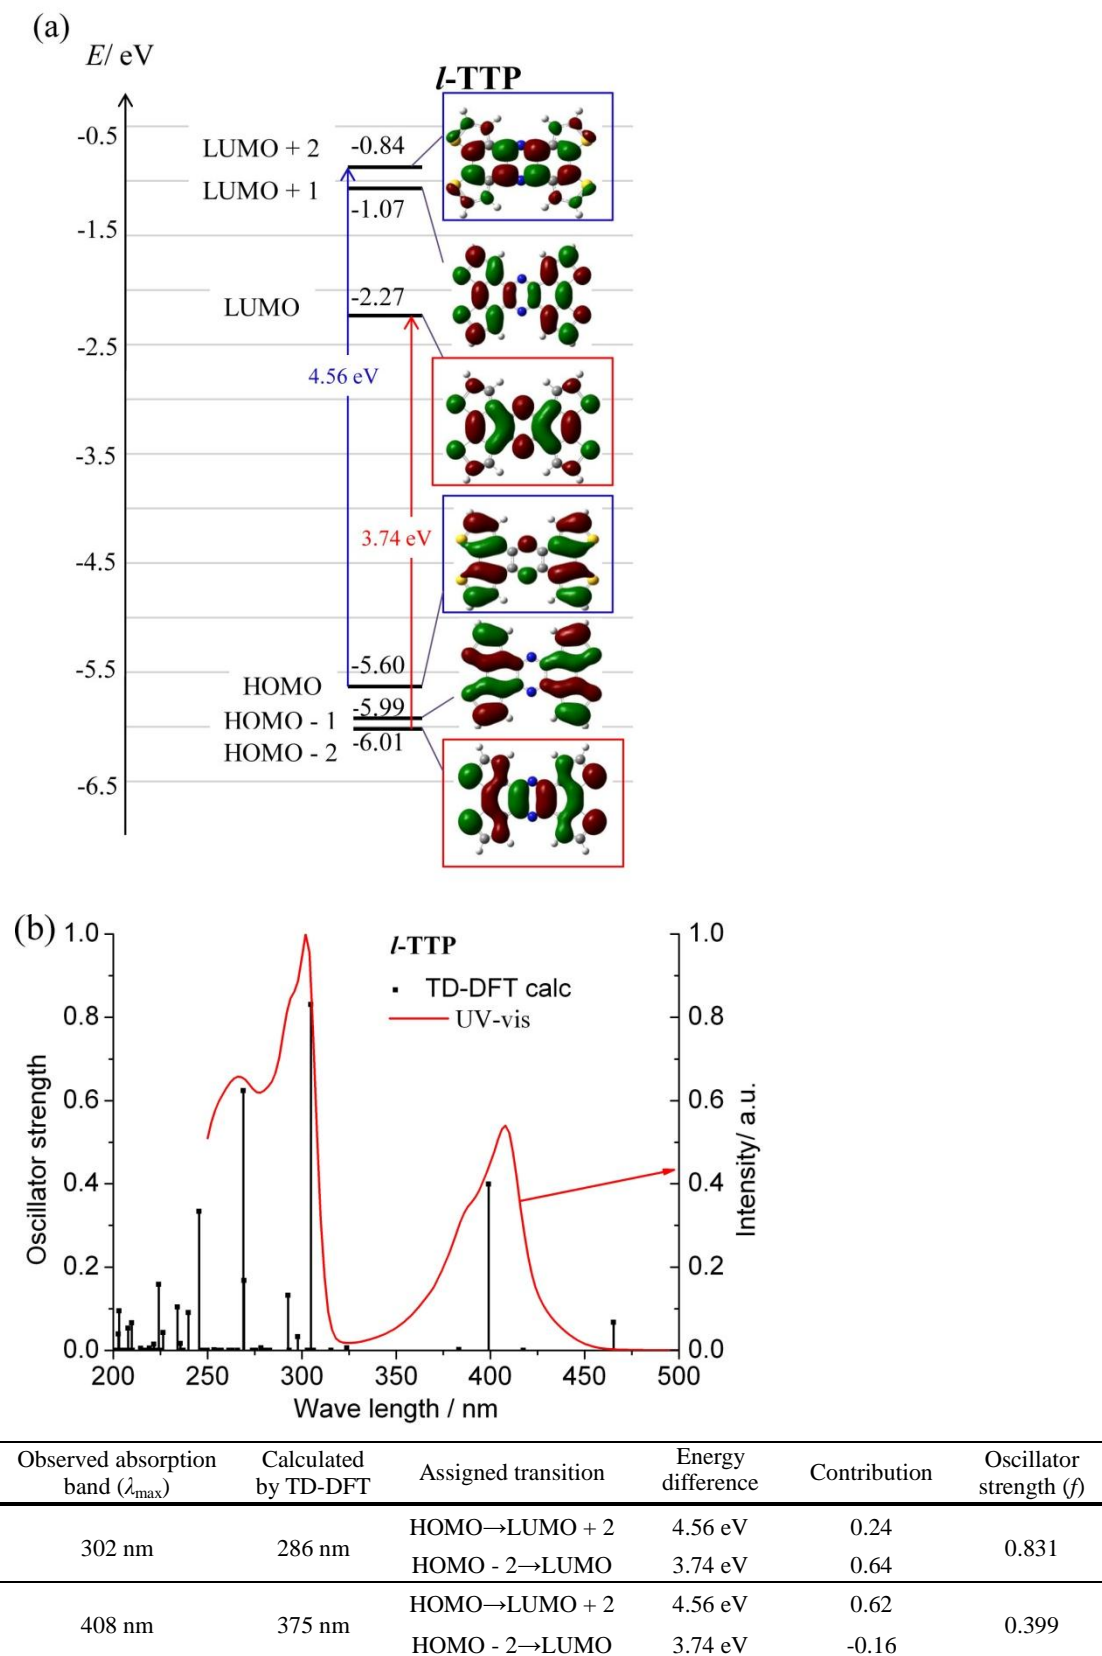

**Figure S6.** (a) Energy diagram and distributions of frontier orbitals of *l*-TTP accompanied with the assignment of optical transitions. (b) UV-vis spectrum of *l*-TTP (red line) in  $\text{CHCl}_3$  accompanied with a simulated transitions (black line) calculated by TD-DFT method (B3LYP/6-31G (d)). Scaling factor is 0.94.

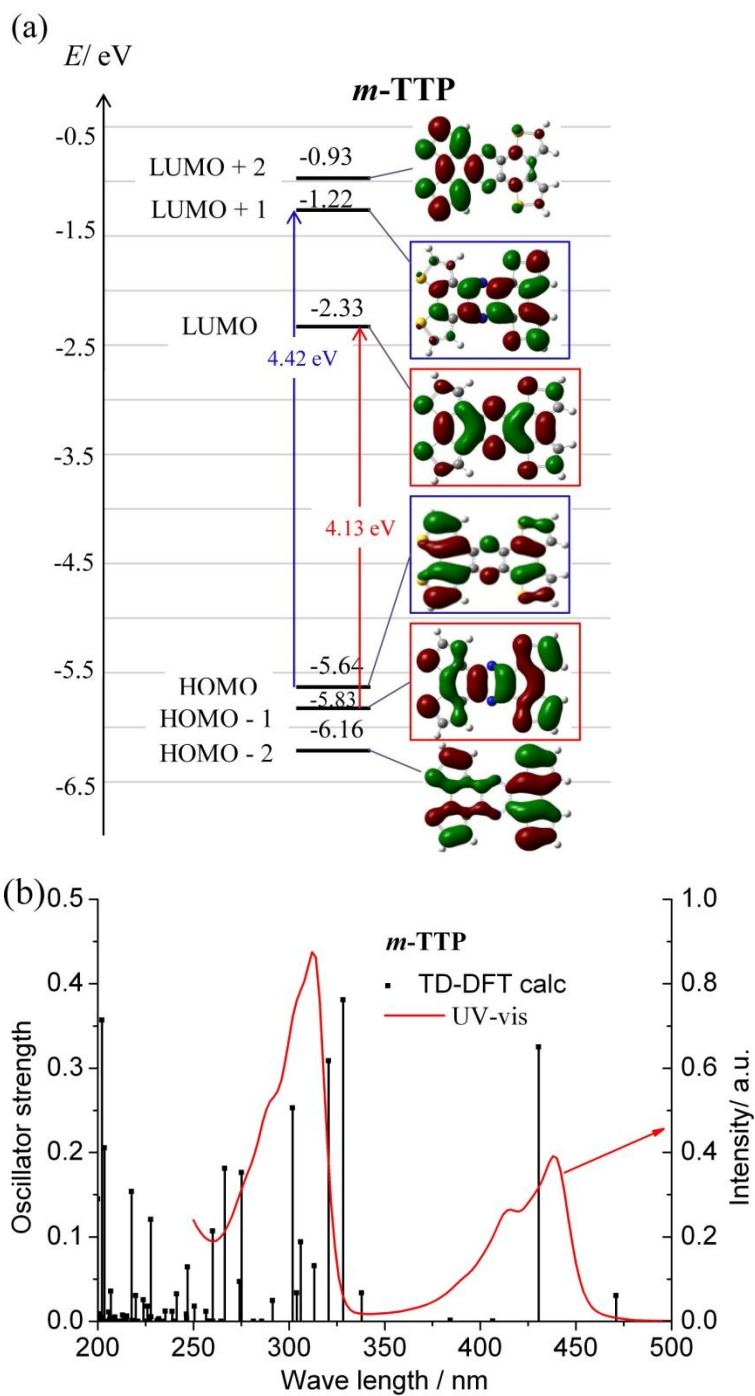

| Observed absorption band ( $\lambda_{\text{max}}$ ) | Calculated by TD-DFT | Assigned transition         | Energy difference | Contribution | Oscillator strength ( $f$ ) |
|-----------------------------------------------------|----------------------|-----------------------------|-------------------|--------------|-----------------------------|
| 312 nm                                              | 309 nm               | HOMO $\rightarrow$ LUMO + 1 | 4.42 eV           | 0.58         | 0.381                       |
|                                                     |                      | HOMO - 1 $\rightarrow$ LUMO | 4.13 eV           | -0.12        |                             |
| 439 nm                                              | 405 nm               | HOMO $\rightarrow$ LUMO + 1 | 4.42 eV           | 0.22         | 0.325                       |
|                                                     |                      | HOMO - 1 $\rightarrow$ LUMO | 4.13 eV           | 0.64         |                             |

**Figure S7.** (a) Energy diagram and distributions of frontier orbitals of *m*-TTP accompanied with the assignment of optical transitions. (b) UV-vis spectrum of *m*-TTP (red line) in  $\text{CHCl}_3$  accompanied with a simulated transitions (black line) calculated by TD-DFT method (B3LYP/6-31G (d)). Scaling factor is 0.94.

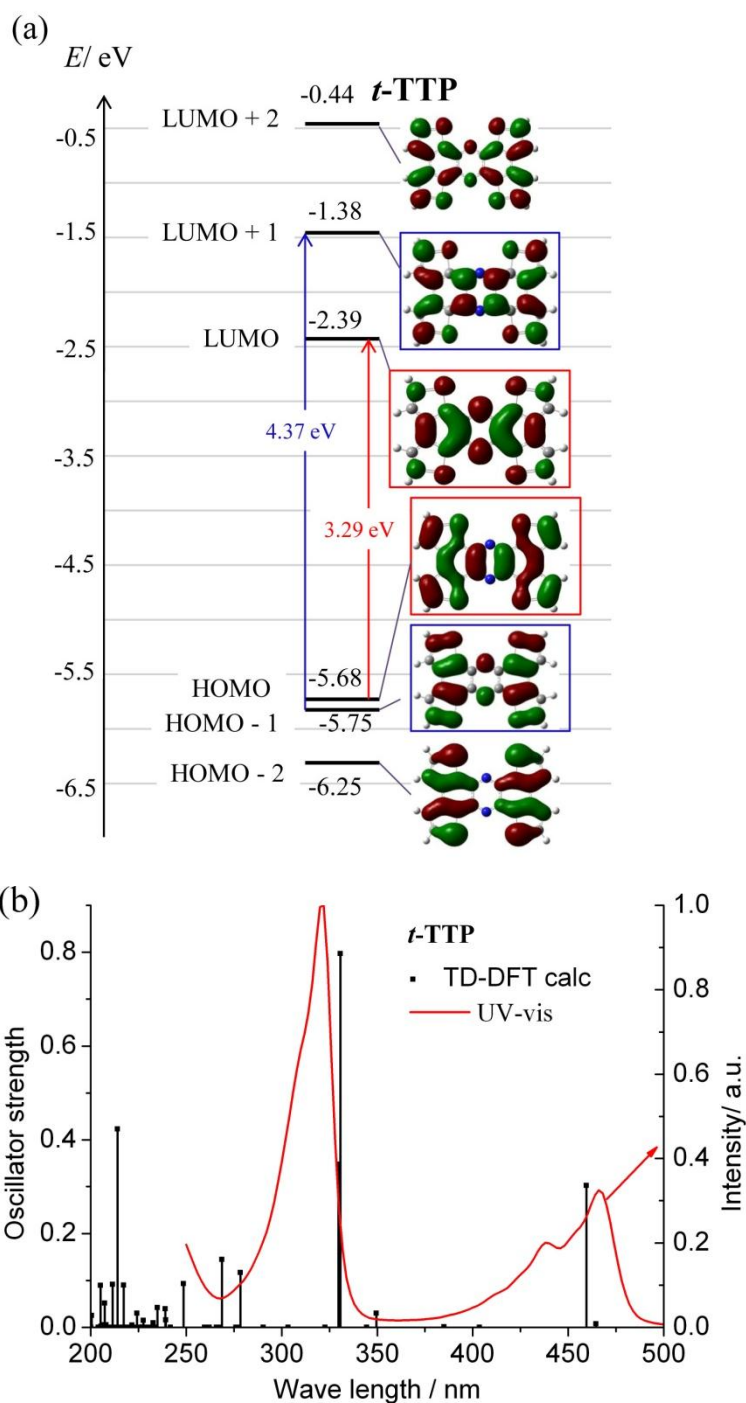

| Observed absorption band ( $\lambda_{\text{max}}$ ) | Calculated by TD-DFT | Assigned transition             | Energy difference | Contribution | Oscillator strength ( $f$ ) |
|-----------------------------------------------------|----------------------|---------------------------------|-------------------|--------------|-----------------------------|
| 320 nm                                              | 311 nm               | HOMO - 1 $\rightarrow$ LUMO + 1 | 4.37 eV           | 0.63         | 0.797                       |
|                                                     |                      | HOMO $\rightarrow$ LUMO         | 3.29 eV           | 0.13         |                             |
| 467 nm                                              | 432 nm               | HOMO - 1 $\rightarrow$ LUMO + 1 | 4.37 eV           | -0.22        | 0.302                       |
|                                                     |                      | HOMO $\rightarrow$ LUMO         | 3.29 eV           | 0.64         |                             |

**Figure S8.** *t*-TTP: (a) Energy diagram and distributions of frontier orbitals of *t*-TTP accompanied with the assignment of optical transitions. (b) UV-vis spectrum of *t*-TTP (red line) in  $\text{CHCl}_3$  accompanied with a simulated transitions (black line) calculated by TD-DFT method (B3LYP/6-31G (d)). Scaling factor is 0.94.



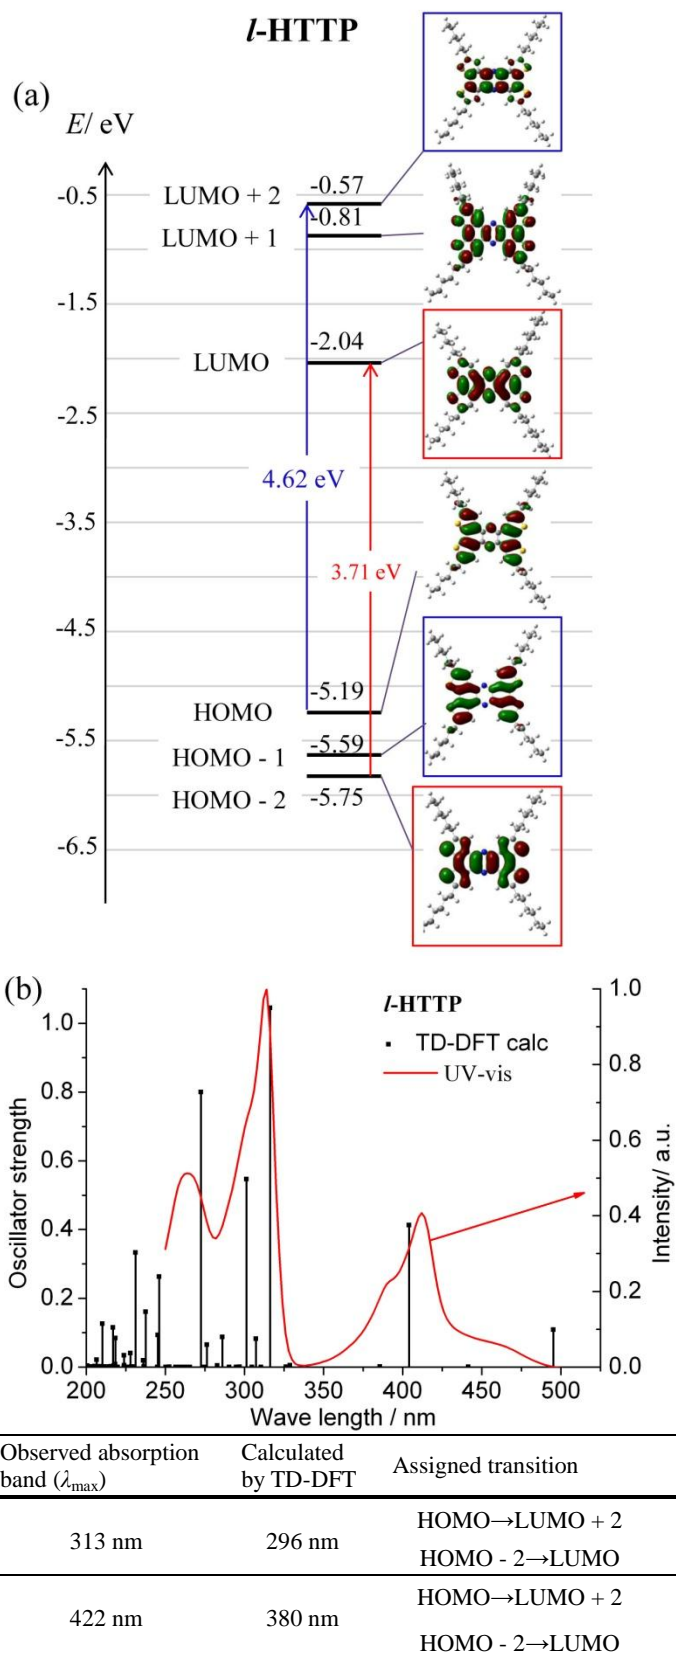

**Figure S9.** (a) Energy diagram and distributions of frontier orbitals of *l*-HTTP accompanied with the assignment of optical transitions. (b) UV-vis spectrum of *l*-HTTP (red line) in CHCl<sub>3</sub> accompanied with a simulated transitions (black line) calculated by TD-DFT method (B3LYP/6-31G (d)). Scaling factor is 0.94.

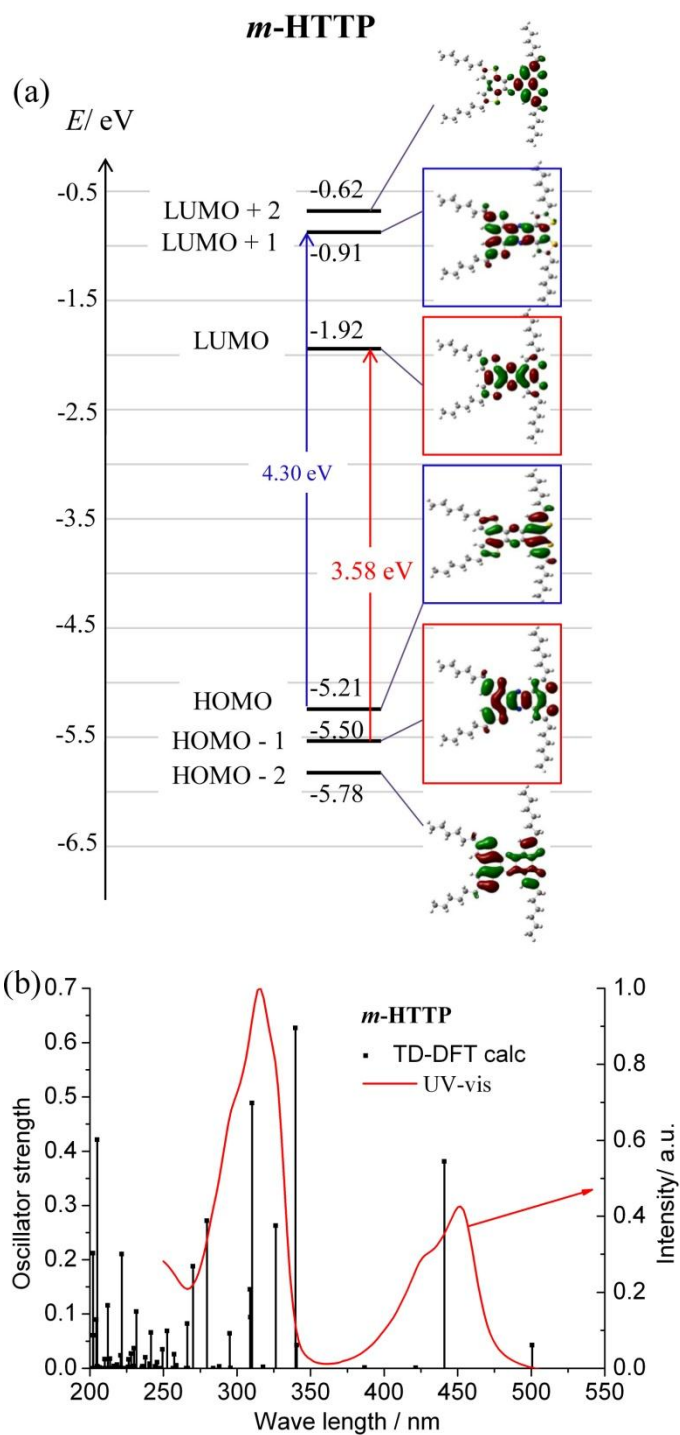

| Observed absorption band ( $\lambda_{\max}$ ) | Calculated by TD-DFT | Assigned transition | Energy difference | Contribution | Oscillator strength ( $f$ ) |
|-----------------------------------------------|----------------------|---------------------|-------------------|--------------|-----------------------------|
| 315 nm                                        | 319 nm               | HOMO → LUMO + 1     | 4.30 eV           | 0.62         | 0.627                       |
|                                               |                      | HOMO - 1 → LUMO     | 3.58 eV           | 0.13         |                             |
| 451 nm                                        | 414 nm               | HOMO → LUMO + 1     | 4.30 eV           | -0.21        | 0.381                       |
|                                               |                      | HOMO - 1 → LUMO     | 3.58 eV           | 0.64         |                             |

**Figure S10.** (a) Energy diagram and distributions of frontier orbitals of *m*-HTTP accompanied with the assignment of optical transitions. (b) UV-vis spectrum of *m*-HTTP (red line) in  $\text{CHCl}_3$  accompanied with a simulated transitions (black line) calculated by TD-DFT method (B3LYP/6-31G (d)). Scaling factor is 0.94.

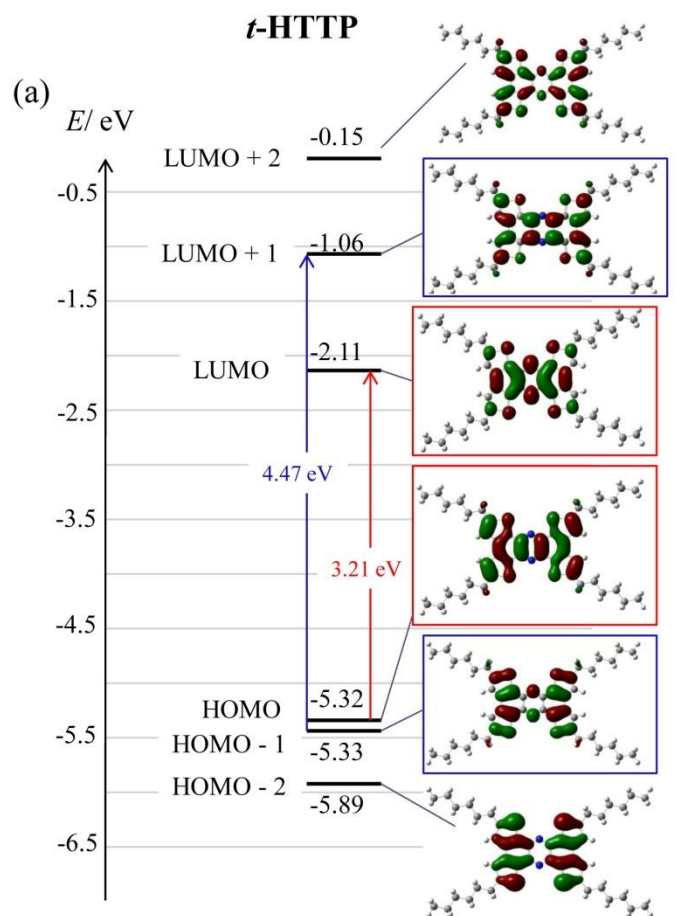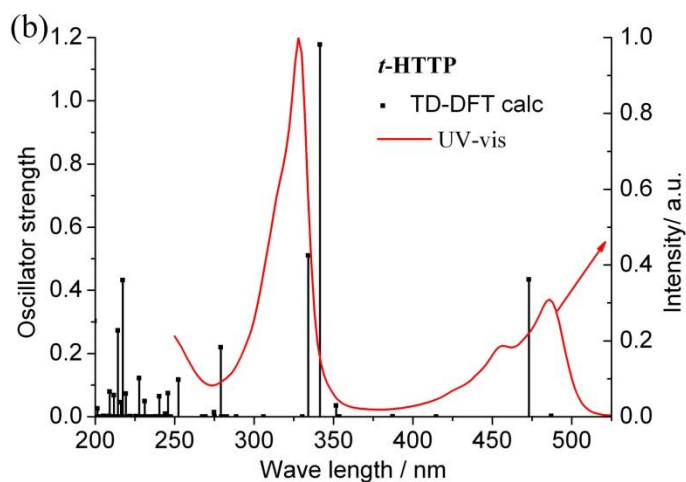

| Observed absorption band ( $\lambda_{\max}$ ) | Calculated by TD-DFT | Assigned transition             | Energy difference | Contribution | Oscillator strength ( $f$ ) |
|-----------------------------------------------|----------------------|---------------------------------|-------------------|--------------|-----------------------------|
| 328 nm                                        | 321 nm               | HOMO - 1 $\rightarrow$ LUMO + 1 | 4.47 eV           | 0.64         | 1.178                       |
|                                               |                      | HOMO $\rightarrow$ LUMO         | 3.21 eV           | 0.13         |                             |
| 486 nm                                        | 445 nm               | HOMO - 1 $\rightarrow$ LUMO + 1 | 4.47 eV           | -0.21        | 0.434                       |
|                                               |                      | HOMO $\rightarrow$ LUMO         | 3.21 eV           | 0.64         |                             |

**Figure S11.** (a) Energy diagram and distributions of frontier orbitals of *t*-HTTP accompanied with the assignment of optical transitions. (b) UV-vis spectrum of *t*-HTTP (red line) in  $\text{CHCl}_3$  accompanied with a simulated transitions (black line) calculated by TD-DFT method (B3LYP/6-31G (d)). Scaling factor is 0.94.

## *l*-TTA

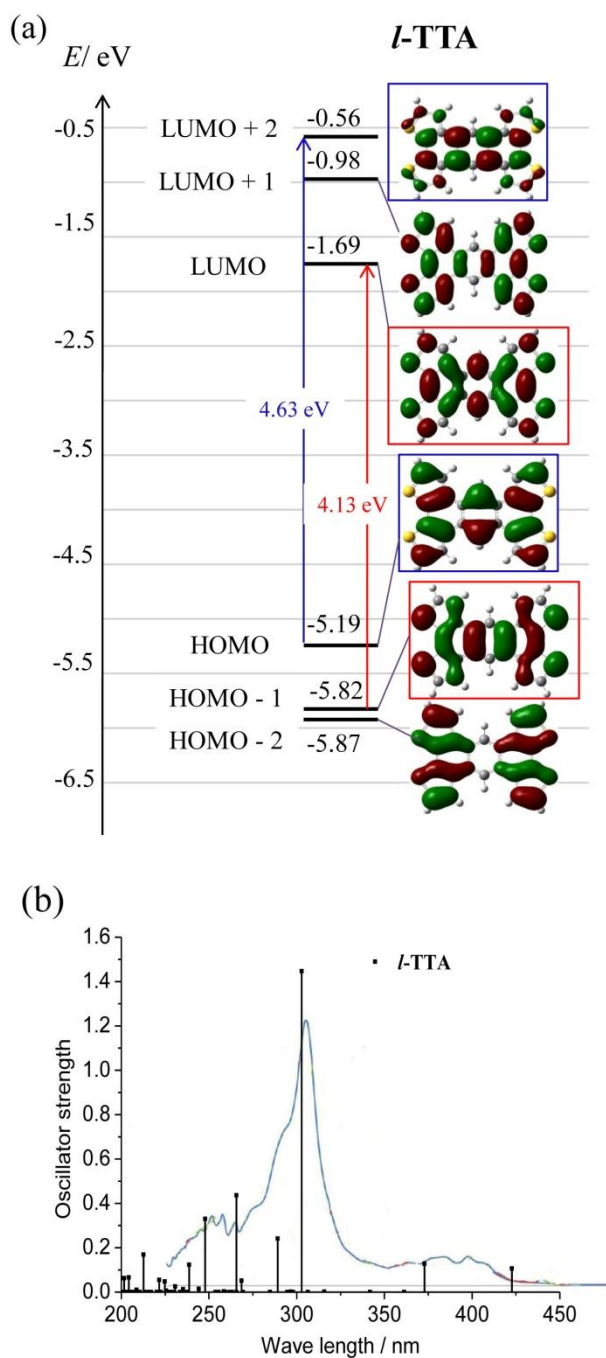

| Observed absorption band ( $\lambda_{\max}$ ) | Calculated by TD-DFT | Assigned transition | Energy difference | Contribution | Oscillator strength ( $f$ ) |
|-----------------------------------------------|----------------------|---------------------|-------------------|--------------|-----------------------------|
| 300 nm(strong)                                | 286 nm               | HOMO→LUMO + 2       | 4.63 eV           | 0.59         | 1.446                       |
|                                               |                      | HOMO - 1→LUMO       | 4.13 eV           | 0.35         |                             |
| 479 nm(weak)                                  | 350 nm               | HOMO→LUMO + 2       | 4.63 eV           | -0.35        | 0.127                       |
|                                               |                      | HOMO - 1→LUMO       | 4.13 eV           | 0.61         |                             |

**Figure S12.** *l*-TTA: (a) Energy diagram and distributions of frontier orbitals of *l*-TTA accompanied with the assignment of optical transitions. (b) UV-vis spectrum of *l*-TTA (blue line) in DCM<sup>1</sup> accompanied with a simulated transitions (black line) calculated by TD-DFT method (B3LYP/6-31G (d)). Scaling factor is 0.94.

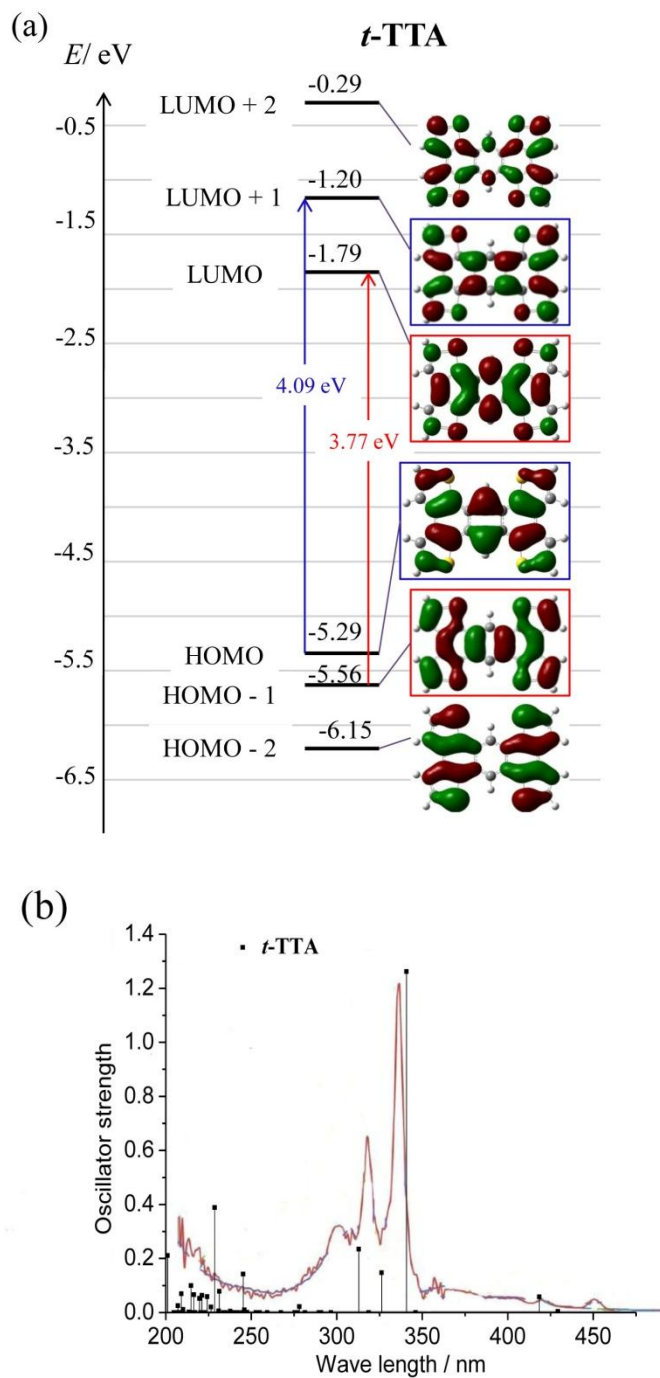

| Observed absorption band ( $\lambda_{\text{max}}$ ) | Calculated by TD-DFT | Assigned transition         | Energy difference | Contribution | Oscillator strength ( $f$ ) |
|-----------------------------------------------------|----------------------|-----------------------------|-------------------|--------------|-----------------------------|
| 310 nm (strong)                                     | 320 nm               | HOMO $\rightarrow$ LUMO + 1 | 4.09 eV           | 0.60         | 1.262                       |
|                                                     |                      | HOMO - 1 $\rightarrow$ LUMO | 3.77 eV           | -0.37        |                             |
| 418 nm (weak)                                       | 393 nm               | HOMO $\rightarrow$ LUMO + 1 | 4.09 eV           | 0.37         | 0.058                       |
|                                                     |                      | HOMO - 1 $\rightarrow$ LUMO | 3.77 eV           | 0.60         |                             |

**Figure S13.** *t*-TTA: (a) Energy diagram and distributions of frontier orbitals of *t*-TTA accompanied with the assignment of optical transitions. (b) UV-vis spectrum of *t*-TTA (purple line) in DCM<sup>1</sup> accompanied with a simulated transitions (black line) calculated by TD-DFT method (B3LYP/6-31G (d)). Scaling factor is 0.94.

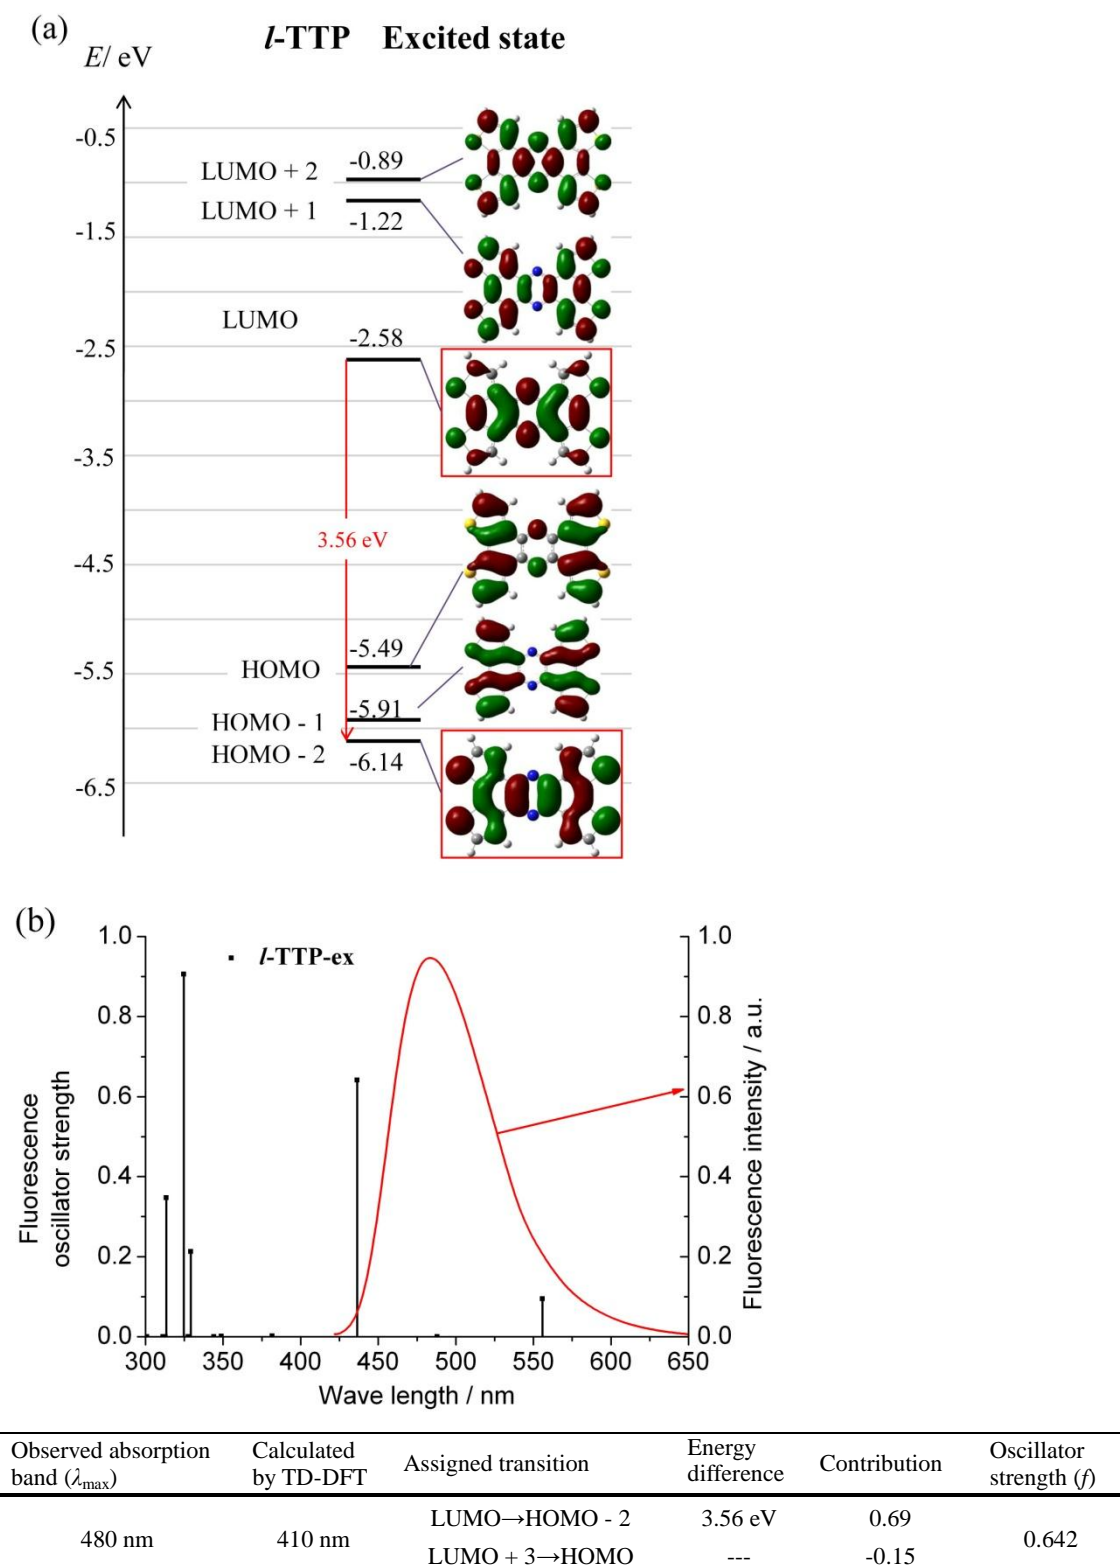

**Figure S14.** (a) Energy diagram and spatial distributions of frontier orbitals of an excited state of *l*-TTP accompanied with the assignment of photoluminescence transition. (b) Observed fluorescence spectrum (red line) of in CHCl<sub>3</sub> solution ( $\lambda_{\text{ex}} = 303$  nm) and simulated spectrum (black line) with TD-DFT method (B3LYP/6-31G (d)). Scaling factor is 0.94.

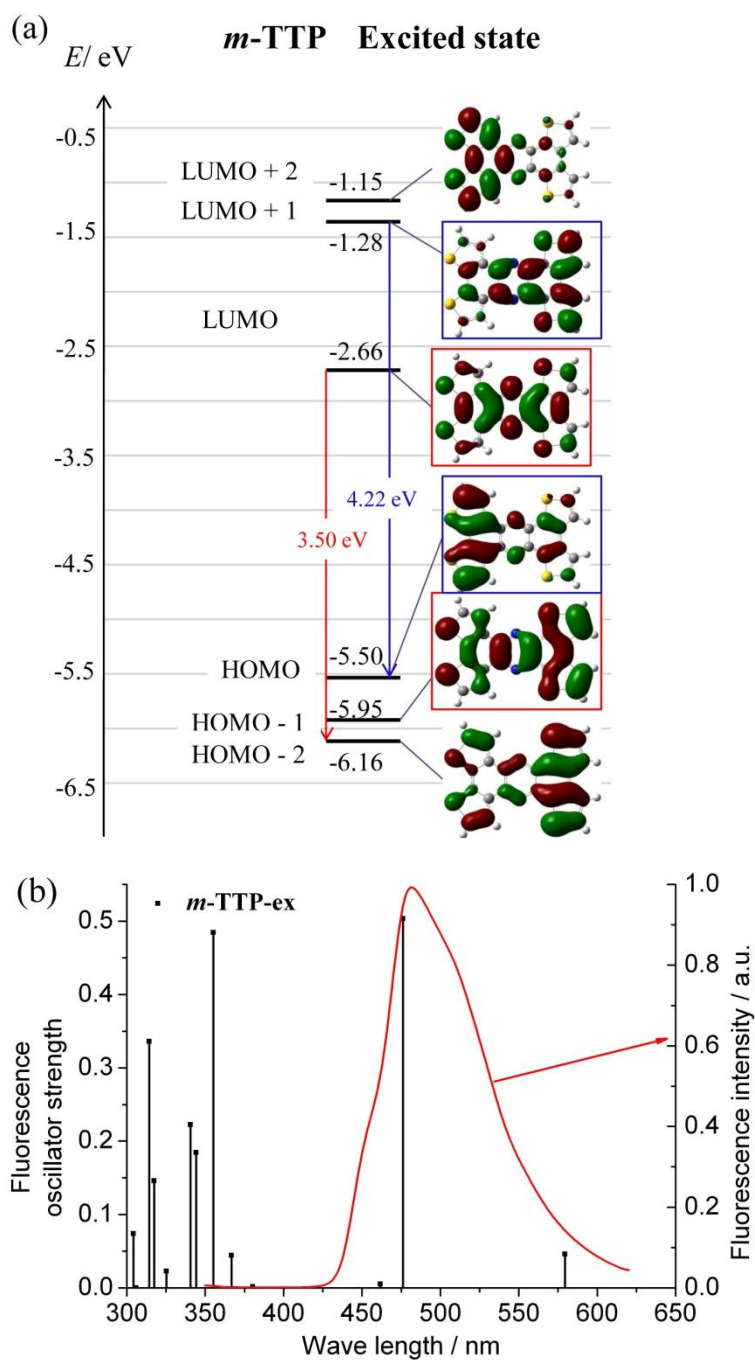

| Observed absorption band ( $\lambda_{\text{max}}$ ) | Calculated by TD-DFT | Assigned transition | Energy difference | Contribution | Oscillator strength ( $f$ ) |
|-----------------------------------------------------|----------------------|---------------------|-------------------|--------------|-----------------------------|
| 481 nm                                              | 448 nm               | LUMO→HOMO - 1       | 3.50 eV           | 0.69         | 0.503                       |
|                                                     |                      | LUMO + 1→HOMO       | 4.22 eV           | -0.12        |                             |

**Figure S15.** (a) Energy diagram and spatial distributions of frontier orbitals of an excited state of *m*-TTP accompanied with the assignment of photoluminescence transition. (b) Observed fluorescence spectrum (red line) of in  $\text{CHCl}_3$  solution ( $\lambda_{\text{ex}} = 316$  nm) and simulated spectrum (black line) with TD-DFT method (B3LYP/6-31G (d)). Scaling factor is 0.94.

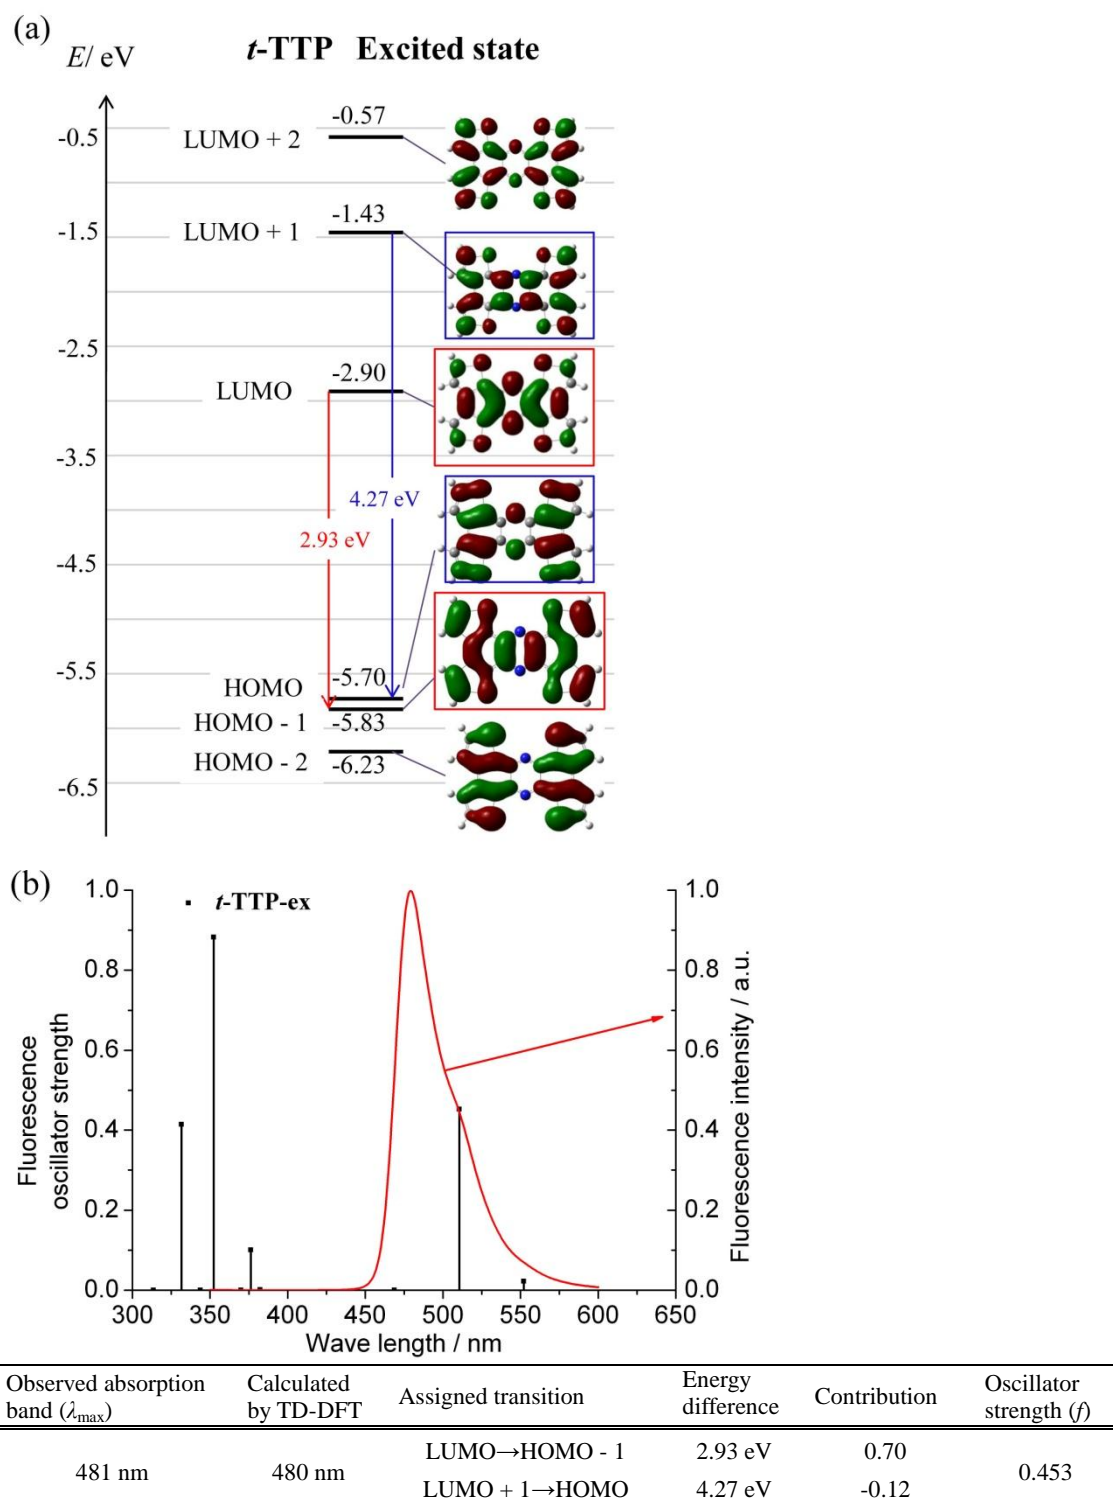

**Figure S16.** (a) Energy diagram and spatial distributions of frontier orbitals of an excited state of *t*-TTP accompanied with the assignment of photoluminescence transition. (b) Observed fluorescence spectrum (red line) of in CHCl<sub>3</sub> solution ( $\lambda_{\text{ex}} = 322$  nm) and simulated spectrum (black line) with TD-DFT method (B3LYP/6-31G (d)). Scaling factor is 0.94.



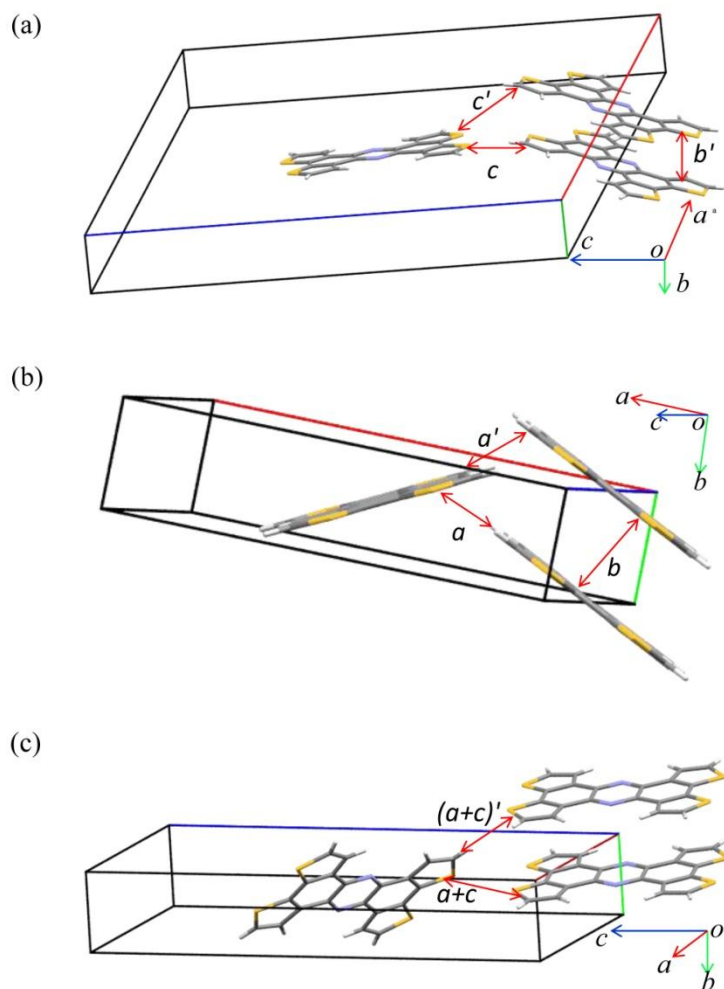

**Figure S17.** Effective intermolecular contacts in *l*-TTP crystal along *b*-axis (a), *b*-axis (b) and *a* + *c* direction (c).

**Table S2.** Theoretical estimated intermolecular transfer integrals ( $H_{ab}$ ), overlap integrals ( $S_{ab}$ ), center-to-center distances ( $d$ ), orbital interaction energy ( $V$ ), reorganization energy ( $\lambda$ ) and hopping mobilities for each molecular contact.

|               | Contact <sup>a</sup> | $H_{ab}^b$ /meV | $S_{ab}^b$ /meV | $d$ /Å | $V$ /meV | $\lambda^c$ / meV | $\frac{\mu_{\text{hopping}}}{\text{cm}^2 \text{V}^{-1} \text{S}^{-1}}$ |
|---------------|----------------------|-----------------|-----------------|--------|----------|-------------------|------------------------------------------------------------------------|
| <i>l</i> -TTP | <i>b</i>             | -135.4          | 11.2            | 3.892  | -76.5    | 153               | $5.3 \times 10^{-1}$                                                   |
| <i>l</i> -TTP | <i>a</i>             | 7.7             | -0.7            | 8.748  | .3.6     | 153               | $6.1 \times 10^{-3}$                                                   |
| <i>l</i> -TTP | <i>c</i>             | -8.9            | -0.9            | 13.001 | -4.0     | 153               | $1.7 \times 10^{-2}$                                                   |
| <i>l</i> -TTP | <i>c'</i>            | 14.47           | -1.6            | 13.002 | .5.9     | 153               | $3.5 \times 10^{-2}$                                                   |
| <i>l</i> -TTP | <i>a+c</i>           | -1.5            | 0.2             | 12.934 | -0.6     | 153               | $4.0 \times 10^{-4}$                                                   |
| <i>l</i> -TTP | <i>(a+c)'</i>        | 3.2             | -0.3            | 13.507 | .1.6     | 153               | $2.9 \times 10^{-3}$                                                   |
| <i>l</i> -TTP | <i>b'</i>            | -162.4          | 13.9            | 3.892  | -91.3    | 153               | $7.6 \times 10^{-1}$                                                   |

<sup>a</sup> Corresponding molecular contacts are indicated in figure S17. <sup>b</sup> Calculated in PW91/TZ2P level.

<sup>c</sup> Calculated in B3LYP/6-31G(d) level.

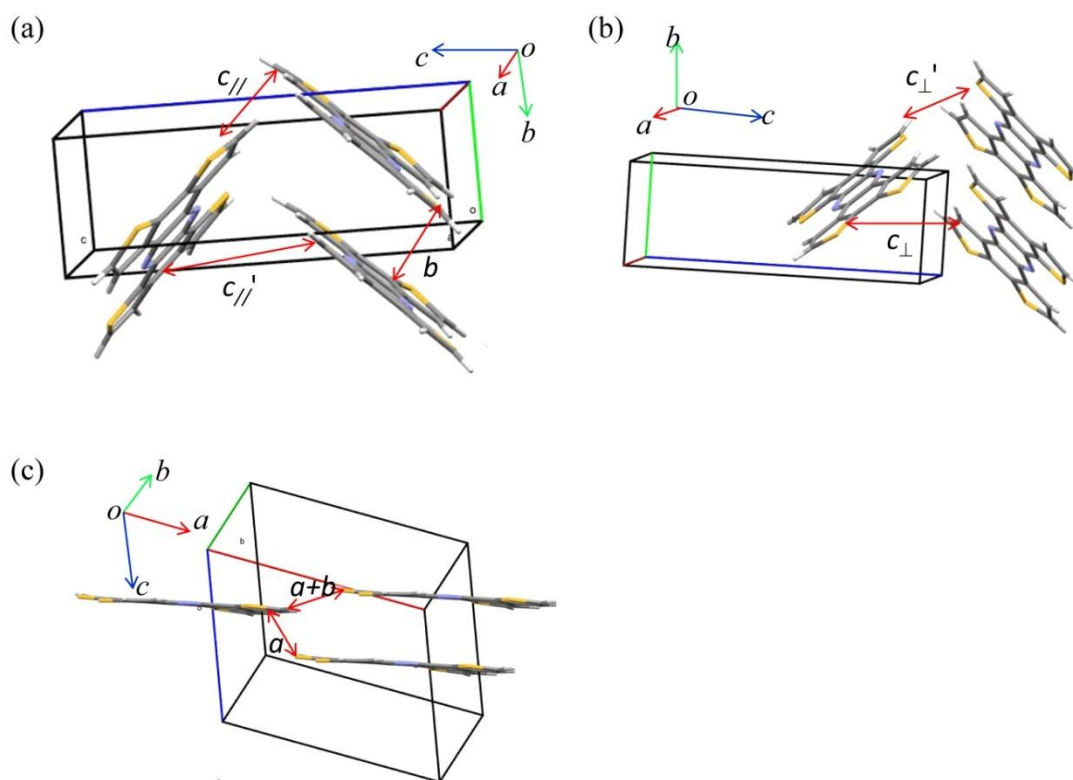

**Figure S18.** Effective intermolecular contacts in *m*-TTP crystal along *c*-axis (a), *a*-axis (b) and *a* + *c* direction (c).

**Table S3.** Theoretical estimated intermolecular transfer integrals (*Hab*), overlap integrals (*Sab*), center-to-center distances (*d*), orbital interaction energy (*V*), reorganization energy ( $\lambda$ ) and hopping mobilities for each molecular contact.

|               | Contact <sup>a</sup> | $Hab^b$ /meV | $Sab^b$ /meV | $d / \text{\AA}$ | $V$ /meV | $\lambda^c$ / meV | $\frac{\mu_{\text{hopping}}}{\text{cm}^2 \text{V}^{-1} \text{S}^{-1}}$ |
|---------------|----------------------|--------------|--------------|------------------|----------|-------------------|------------------------------------------------------------------------|
| <i>m</i> -TTP | <i>a</i>             | -0.7         | 0.1          | 12.581           | -0.3     | 169               | $8.9 \times 10^{-5}$                                                   |
| <i>m</i> -TTP | <i>a</i> + <i>b</i>  | 0.4          | 0            | 13.474           | 0.2      | 169               | $4.0 \times 10^{-5}$                                                   |
| <i>m</i> -TTP | <i>b</i>             | -133.3       | 12.9         | 4.825            | -66.5    | 169               | $5.0 \times 10^{-1}$                                                   |
| <i>m</i> -TTP | $c_{//}$             | -1.0         | 0            | 7.857            | -1.1     | 169               | $3.7 \times 10^{-4}$                                                   |
| <i>m</i> -TTP | $c_{//}'$            | -1.8         | 0            | 7.857            | -1.9     | 169               | $1.1 \times 10^{-3}$                                                   |
| <i>m</i> -TTP | $c_{\perp}$          | 25.9         | -2.6         | 11.941           | 11.7     | 169               | $9.5 \times 10^{-2}$                                                   |
| <i>m</i> -TTP | $c_{\perp}'$         | 25.7         | -2.7         | 11.941           | 11.5     | 169               | $9.2 \times 10^{-2}$                                                   |

<sup>a</sup> Corresponding molecular contacts are indicated in figure S18. <sup>b</sup> Calculated in PW91/TZ2P level.

<sup>c</sup> Calculated in B3LYP/6-31G(d) level.

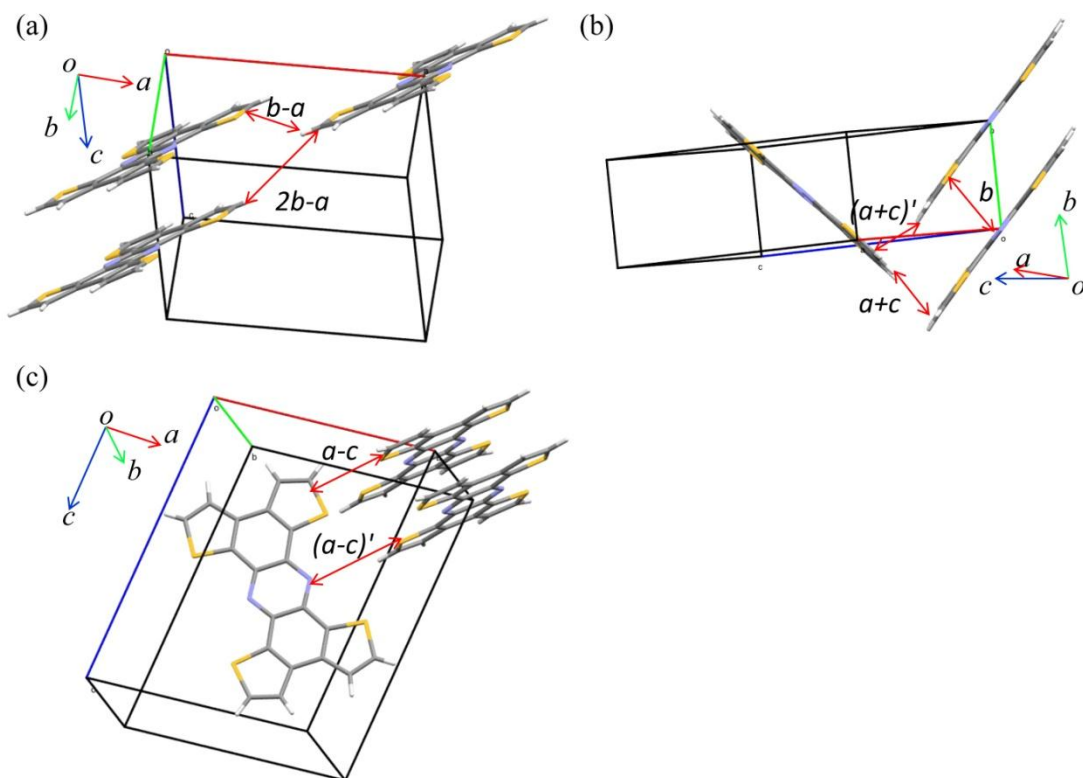

**Figure S19.** Effective intermolecular contacts in *t*-TTP crystal along *c*-axis (a), *b*-axis (b) and *a* - *c* direction (c).

**Table S4.** Theoretical estimated intermolecular transfer integrals (*Hab*), overlap integrals (*Sab*), center-to-center distances (*d*), orbital interaction energy (*V*), reorganization energy ( $\lambda$ ) and hopping mobilities for each molecular contact.

|               | Contact <sup>a</sup> | $H_{ab}^b$ /meV | $S_{ab}^b$ /meV | $d$ /Å | $V$ /meV | $\lambda^c$ /meV | $\frac{\mu_{\text{hopping}}}{\text{cm}^2 \text{V}^{-1} \text{S}^{-1}}$ |
|---------------|----------------------|-----------------|-----------------|--------|----------|------------------|------------------------------------------------------------------------|
| <i>t</i> -TTP | $2b-a$               | 0.2             | -0.02           | 15.069 | 0        | 174              | $1.9 \times 10^{-6}$                                                   |
| <i>t</i> -TTP | $b-a$                | 0.6             | -0.2            | 12.314 | -0.4     | 174              | $1.3 \times 10^{-4}$                                                   |
| <i>t</i> -TTP | $b$                  | 59.1            | -7.4            | 5.014  | 20.2     | 174              | $4.7 \times 10^{-2}$                                                   |
| <i>t</i> -TTP | $a+c$                | -21.9           | 2.4             | 9.262  | -9.3     | 174              | $3.4 \times 10^{-2}$                                                   |
| <i>t</i> -TTP | $(a+c)'$             | -24.1           | 2.4             | 9.262  | -9.3     | 174              | $5.0 \times 10^{-2}$                                                   |
| <i>t</i> -TTP | $a-c$                | -8.3            | 0.9             | 11.862 | -3.6     | 174              | $8.4 \times 10^{-3}$                                                   |
| <i>t</i> -TTP | $(a-c)'$             | 5.0             | -0.4            | 9.509  | 3.0      | 174              | $3.7 \times 10^{-3}$                                                   |

<sup>a</sup> Corresponding molecular contacts are indicated in figure S19. <sup>b</sup> Calculated in PW91/TZ2P level.

<sup>c</sup> Calculated in B3LYP/6-31G(d) level.

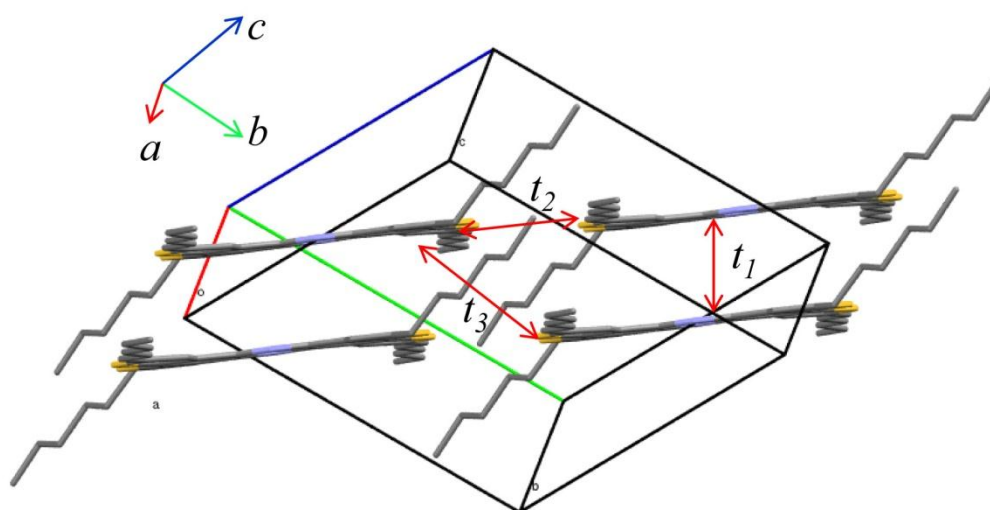

**Figure S20.** Effective intermolecular contacts in *l*-HTTP crystal.

**Table S5.** Theoretical estimated intermolecular transfer integrals ( $H_{ab}$ ), overlap integrals ( $S_{ab}$ ), center-to-center distances ( $d$ ), orbital interaction energy ( $V$ ), reorganization energy ( $\lambda$ ) and hopping mobilities for each molecular contact.

|                | Contact <sup>a</sup> | $H_{ab}^b$ /meV | $S_{ab}^b$ /meV | $d$ /Å | $V$ /meV | $\lambda^c$ /m eV | $\frac{\mu_{\text{hopping}}}{\text{cm}^2 \text{ V}^{-1} \text{ S}^{-1}}$ |
|----------------|----------------------|-----------------|-----------------|--------|----------|-------------------|--------------------------------------------------------------------------|
| <i>l</i> -HTTP | $t_1$                | -50.8           | 5.6             | 4.892  | -25.0    | 155               | $8.7 \times 10^{-2}$                                                     |
| <i>l</i> -HTTP | $t_3$                | -0.4            | 0               | 14.988 | 0        | 155               | $6.3 \times 10^{-5}$                                                     |
| <i>l</i> -HTTP | $t_2$                | -3.9            | 0.4             | 12.749 | -2.0     | 155               | $3.8 \times 10^{-3}$                                                     |

<sup>a</sup> Corresponding molecular contacts are indicated in figure S20. <sup>b</sup> Calculated in PW91/TZ2P level.

<sup>c</sup> Calculated in B3LYP/6-31G(d) level.

<sup>1</sup> Brusso, J. L.; Hirst, O. D.; Dadvand, A.; Ganesan, S.; Cicoira, F.; Robertson, C. M.; Oakley, R. T.; Rosei, F.; Perepichka, D. F. *Chem. Mater.* **2008**, *20*, 2484-2494.
